# Supplementary material for: MicroRNA regulation of progesterone receptor in breast cancer
Source: PubMed Central journal article supplement (PMC5432230; doi:10.18632/oncotarget.15657), 2017-02-23
Supplement: oncotarget-08-25963-s001.pdf [file oncotarget-08-25963-s001.pdf]

## MicroRNA regulation of progesterone receptor in breast cancer

### Supplementary Material

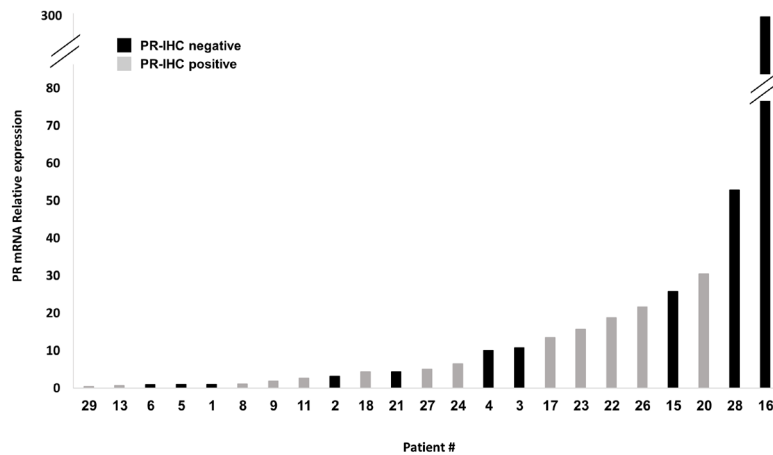

**Supplementary Figure S1: Expression levels in adjacent normal tissue samples.** Relative expression of PR mRNA in PR IHC-negative and positive groups in individual patients. Levels of PR mRNA were determined by quantitative RT-PCR analysis. The comparative threshold cycle (Ct) method was used for quantification. PR IHC-negative (n=11); PR IHC-positive (n=12).

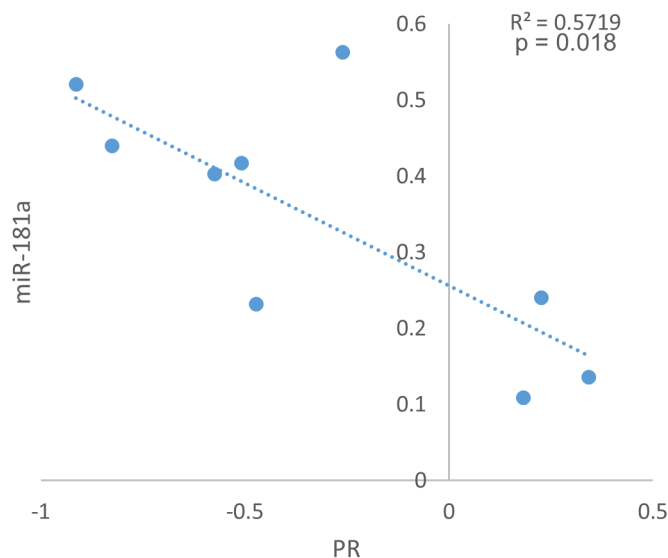

**Supplementary Figure S2: Expression fold change of miR-181a and PR mRNA in each breast cancer tumor and its' adjacent normal tissue, in PR IHC-negative samples (n=9).** Levels of miR-181a and PR mRNA were determined by quantitative RT-PCR analysis. The comparative threshold cycle (Ct) method was used for quantification. Values are presented in log scale. Line represents the linear regression analysis;  $R^2$  (Goodness-of-fit) for the linear regression analysis and p-value are indicated.

**Supplementary Table S1.** PR mRNA, miR-181a, miR-23a and miR-26b expression Fold change (tumor sample vs. adjacent normal tissue) ), according to PR mRNA expression fold change

|                                 | Patient no. | PR mRNA | miR-181a | miR-23a | miR-26b | PR-IHC status |                                | %        |
|---------------------------------|-------------|---------|----------|---------|---------|---------------|--------------------------------|----------|
| <b>PR down-regulation group</b> | 15          | 0.122   | 3.320    | 1.382   | 1.009   | Negative      | 6/8 Negative<br>2/8 Positive   | 75<br>25 |
|                                 | 16          | 0.149   | 2.751    | 1.085   | 5.066   | Negative      |                                |          |
|                                 | 21          | 0.267   | 2.529    | 0.804   | 1.922   | Negative      |                                |          |
|                                 | 5           | 0.310   | 2.614    | 2.767   | 5.113   | Negative      |                                |          |
|                                 | 28          | 0.338   | 1.706    | 1.087   | 1.469   | Negative      |                                |          |
|                                 | 4           | 0.549   | 3.655    | 3.876   | 5.552   | Negative      |                                |          |
|                                 | 26          | 0.598   | 0.720    | 0.344   | 0.224   | Positive      |                                |          |
|                                 | 23          | 0.608   | 0.758    | 0.817   | 1.046   | Positive      |                                |          |
| <b>No Change</b>                | 20          | 0.807   | 1.738    | 1.597   | 1.091   | Positive      |                                |          |
| <b>PR up-regulation group</b>   | 1           | 1.525   | 1.285    | 4.544   | 5.407   | Negative      | 3/10 Negative<br>7/10 Positive | 30<br>70 |
|                                 | 17          | 1.634   | 6.433    | 2.102   | 6.066   | Positive      |                                |          |
|                                 | 2           | 1.683   | 1.740    | 0.879   | 2.937   | Negative      |                                |          |
|                                 | 3           | 2.201   | 1.366    | 2.614   | 3.037   | Negative      |                                |          |
|                                 | 8           | 2.523   | 0.816    | 0.394   | 2.548   | Positive      |                                |          |
|                                 | 11          | 6.597   | 0.585    | 0.232   | 1.741   | Positive      |                                |          |
|                                 | 27          | 7.812   | 0.355    | 0.272   | 0.198   | Positive      |                                |          |
|                                 | 22          | 11.538  | 2.069    | 1.397   | 2.433   | Positive      |                                |          |
|                                 | 24          | 12.007  | 2.061    | 0.729   | 0.302   | Positive      |                                |          |
|                                 | 9           | 12.245  | 0.529    | 0.193   | 1.819   | Positive      |                                |          |

PR, progesterone receptor; □ <0.8 ; □ >1.2

**Supplementary Table S2.** PR mRNA, miR-181a, miR-23a and miR-26b expression Fold change (tumor sample vs. adjacent normal tissue), according to PR IHC status

| Patient no. | PR mRNA | miR-181a | miR-23a | miR-26b | PR-IHC status |
|-------------|---------|----------|---------|---------|---------------|
| 26          | 0.598   | 0.720    | 0.344   | 0.224   | Positive      |
| 23          | 0.608   | 0.758    | 0.817   | 1.046   | Positive      |
| 20          | 0.807   | 1.738    | 1.597   | 1.091   | Positive      |
| 17          | 1.634   | 6.433    | 2.102   | 6.066   | Positive      |
| 8           | 2.523   | 0.816    | 0.394   | 2.548   | Positive      |
| 11          | 6.597   | 0.585    | 0.232   | 1.741   | Positive      |
| 27          | 7.812   | 0.355    | 0.272   | 0.198   | Positive      |
| 22          | 11.538  | 2.069    | 1.397   | 2.433   | Positive      |
| 24          | 12.007  | 2.061    | 0.729   | 0.302   | Positive      |
| 9           | 12.245  | 0.529    | 0.193   | 1.819   | Positive      |
| 15          | 0.122   | 3.320    | 1.382   | 1.009   | Negative      |
| 16          | 0.149   | 2.751    | 1.085   | 5.066   | Negative      |
| 21          | 0.267   | 2.529    | 0.804   | 1.922   | Negative      |
| 5           | 0.310   | 2.614    | 2.767   | 5.113   | Negative      |
| 28          | 0.338   | 1.706    | 1.087   | 1.469   | Negative      |
| 4           | 0.549   | 3.655    | 3.876   | 5.552   | Negative      |
| 1           | 1.525   | 1.285    | 4.544   | 5.407   | Negative      |
| 2           | 1.683   | 1.740    | 0.879   | 2.937   | Negative      |
| 3           | 2.201   | 1.366    | 2.614   | 3.037   | Negative      |

PR, progesterone receptor; □ <0.8 ; □ >1.2
